# Supplementary material
Source: publisher figshare collection journal article supplement (https://geolsoc.figshare.com/ndownloader/files/30897753)
Supplement: Supplementary file 1 [file 30897753]

## Sheet: Sheet1
File		Nal1Bi.csv	Nal1Bi.csv	NAL1Bii.csv	NAL1Bii.csv	NAL2Ai.csv	NAL2Ai.csv	NAL2Aii.csv	NAL3CI.csv	NAL3CI.csv	NAL4di.csv	NAL4di.csv	NAL4Dii.csv	NAL4Dii.csv	NAL4Ei.csv	NAL4Ei.csv	NAL4Gi.csv	NAL7Ai.csv	NAL8ai.csv	NAL8ai.csv	NAL8ai.csv
salinity		33.9	33.9	33.9	33.9	30.8	30.8	39	29.8967	30.1827	38	38	38	38	1.0466	1.0466	22.3755	8.53838	1.55868	1.21812	0.87426
Cl molality		5.79487	5.79487	5.79487	5.79487	5.26496	5.26496	6.66667	5.11055	5.15944	6.49573	6.49573	6.49573	6.49573	0.178907	0.178907	3.82487	1.45955	0.26644	0.208225	0.149446
Raw data normalised to 1 ug/g Na
Na23	µg/g	1	1	1	1	1	1	1	1	1	1	1	1	1	1	1	1	1	1	1	1
Ca40	µg/g	1.41584	0.676541	0.09364	0.470525	6.38041	2.3834	35.7742	4.11309	2.12311	2.24829	0.043365	0.953518	0.863119	1.74074	0.991644	4.9509	0.275158	1.32423	136.844	1.34547
Ag107	µg/g	<0.0012	<0.0011	0.0001	<0.0041	<0.0025	0.00438779	<0.0023	0.00778868	0.00102174	<0.0003	<0.0003	<0.0004	0.00572692	<0.0003	<0.0003	<0.0049	0.00240893	<0.0041	0.00365468	<0.0014
Au197	µg/g	0.000665858	0.00126733	<0.00003	0.00382915	0.0021013	0.00839714	0.00167912	0.0145524	0.00239383	0.000170274	0.00170348	0.00187172	0.00194464	0.005589	0.00312297	0.0024133	0.00243027	0.0133961	0.0117898	0.00703397
Reconstructed analyses
Na23	mg/kg	50710.5	74954.6	120323	86459.7	14523.6	32353.6	3638.62	20501.3	34475.5	41667.7	142278	71253.4	74923.9	1370.47	1922.15	13142.3	25485	2427.53	30.2399	1348.95
Ca40	mg/kg	71798	50709.9	11267.1	40681.5	92666.8	77111.5	130169	84323.7	73195.2	93681.1	6169.88	67941.5	64668.3	2385.64	1906.09	65066.1	7012.4	3214.61	4138.16	1814.96
Ag107	mg/kg	0	0	8.70496	0	0	141.961	0	159.678	35.2251	0	0	0	429.083	0	0	0	61.3917	0	0.110517	0
Au197	mg/kg	33.766	94.9925	0	331.067	30.5185	271.677	6.10967	298.343	82.5282	7.09492	242.367	133.366	145.7	7.65958	6.00281	31.7162	61.9356	32.5195	0.356522	9.48845
Table S3: Full LA-ICPMS data set for the Au specific element list analyses. Salinities determined from microthermometric analyses, and used to calculate chlorinity. Concentrations reconstructed using the method of Allan et al., (2005).
Data were filtered by interpretation of the raw time resolved mass spectra available at https://researchdata.brighton.ac.uk/id/eprint/274 to remove Au analyses belwo detetcion limits or inferred to be affect by solid Au either within fluid inclusions or as solid inclusions.
